# Supplementary material for: A dual-emissive ionic liquid based on an anionic platinum(ii) complex
Source: Royal Society of Chemistry journal article supplement (doi:10.1039/c5cc04407c), 2015-01-01
Supplement: c5cc04407c1.pdf [file c5cc04407c1.pdf]

## **Electronic Supplementary Information**

**for**

### **Dual emissive ionic liquid based on an anionic platinum(II) complex**

**Tomohiro Ogawa,<sup>a</sup> Masaki Yoshida,<sup>a</sup> Hiroki Ohara,<sup>a</sup> Atsushi Kobayashi<sup>a,b</sup> and Masako  
Kato<sup>a</sup> \***

<sup>a</sup> Department of Chemistry, Faculty of Science, Hokkaido University, North-10, West-8,  
Kita-ku, Sapporo 060-0810, Japan

<sup>b</sup> A Precursory Research for Embryonic Science and Technology (PRESTO), Japan Science  
and Technology Agency (JST), Honcho 4-1-8, Kawaguchi, Saitama 332-0012, Japan.

## Contents

### Experimental details.

- Table S1.** Luminescence data of neat **1** at 298 K and 77 K.
- Table S2.** Emission lifetime data of neat **1** at 298 K recorded by different wavelength.
- Table S3.** Luminescence data of **1** at 298 K in MeOH ( $1.0 \times 10^{-4}$ ).
- Table S4.** Emission spectral data of **2**.
- Table S5.** Emission spectral data of **3**.
- Table S6.** Crystallographic data of **2**·CH<sub>3</sub>CN and **3**·2H<sub>2</sub>O·CH<sub>3</sub>COCH<sub>3</sub>.
- Table S7.** Selected bond lengths of **2**·CH<sub>3</sub>CN.
- Table S8.** Selected bond angles of **2**·CH<sub>3</sub>CN.
- Table S9.** Selected bond lengths of **3**·2H<sub>2</sub>O·CH<sub>3</sub>COCH<sub>3</sub>.
- Table S10.** Selected bond angles of **3**·2H<sub>2</sub>O·CH<sub>3</sub>COCH<sub>3</sub>.
- Fig. S1.** Thermogravimetry-differential thermal analyses of **1**.
- Fig. S2.** VT-PXRD patterns of **1**.
- Fig. S3.** Emission and excitation spectra of **1** in liquid state and a MeOH solution.
- Fig. S4.** Excitation wavelength dependency for emission spectra of **1** at 298 K.
- Fig. S5.** Excitation spectra of **1** at 298 K.
- Fig. S6.** Absorption spectra of liquid **1** and **1** in CH<sub>2</sub>Cl<sub>2</sub>.
- Fig. S7.** Emission decay curves of ionic liquid **1** at 298 K and 77 K.
- Fig. S8.** Excitation spectra of **1** at 77.
- Fig. S9.** Emission and excitation spectra of neat **1** at 77 K and 333 K.
- Fig. S10.** Molecular structure of [Pt(CN)<sub>2</sub>(ptpy)]<sup>-</sup> of **2**·CH<sub>3</sub>CN.
- Fig. S11.** Perspective views of the complex anion and adjacent *n*-Bu<sub>4</sub>N<sup>+</sup> cations in **2**·CH<sub>3</sub>CN.
- Fig. S12.** Perspective views illustrating the dimeric complex anions in **3**·2H<sub>2</sub>O·CH<sub>3</sub>COCH<sub>3</sub>.
- Fig. S13.** Packing diagram of **3**·2H<sub>2</sub>O·CH<sub>3</sub>COCH<sub>3</sub>.

### References

## Experimental details

### Physical measurements

$^1\text{H}$  NMR spectroscopy was performed using a JEOL EX-270 NMR spectrophotometer. Elemental analyses were carried out at the analysis center in Hokkaido University. Thermogravimetry-differential thermal analysis (TG-DTA) measurements were recorded using a Rigaku Thermoplus EVO TG-DTA 8120 with Al sample pans under a  $\text{N}_2$  flow. Differential scanning calorimetry (DSC) measurements were performed using a METTLER DSC 1 under a  $\text{N}_2$  flow. Variable-temperature powder X-ray diffraction measurements (VT-PXRD) were measured with  $\text{Cu K}\alpha$  using a Bruker D8 Advance diffractometer equipped with a graphite monochromator, a one dimensional LinxEye detector and Anton Paar TTK 450 low-temperature chamber. Absorption spectra were measured using a Shimadzu UV-2500PC Spectrophotometer under  $\text{N}_2$  atmosphere using quartz cells with a thickness of either 1 cm or 1 mm.

### Luminescence measurements

All luminescence measurements of neat **1** were performed under  $\text{N}_2$  atmosphere. Luminescence spectra were measured using a JASCO FR-6600 spectrofluorometer at room temperature and 77 K. Slit widths of the excitation and emission light were 5 or 6 nm. Variable Temperature luminescence spectra were measured by single photon counting using a Hamamatsu Absolute PL Quantum Yield Measurement System C9920-02. Luminescence quantum yields were recorded on a Hamamatsu Photonics C9920-02 absolute photoluminescence quantum yield measurement system equipped with an integrating sphere apparatus and 150 W CW Xenon light source. Hamamatsu Photonics A10095-03 non-luminescent quartz sample holder was used for absolute photoluminescence quantum yield measurements. The accuracy of the instrument was confirmed by the measurement of quantum yield of anthracene in ethanol solution ( $\Phi = 0.27$ ).<sup>1</sup> Emission life time measurements were recorded using a Hamamatsu Photonics, C4334 system equipped with a streak camera as a Photo detector and a nitrogen laser for the 337 nm excitation. Liquid  $\text{N}_2$  cryostat (Optistat-DN optical Dewar and ITC-503 temperature controller, Oxford Instruments) was used for the temperature control.

### Single crystal X-ray diffraction measurements

All single crystal X-ray diffraction measurements were performed using a Rigaku AFC-7R diffractometer with a Mercury CCD area detector and graphite monochromatized  $\text{Mo K}\alpha$

radiation ( $\lambda = 0.71069 \text{ \AA}$ ) at 200 K (complex **2**) and 150 K (complex **3**), respectively. Each single-crystal was mounted on a MicroMount using liquid paraffin. These crystals were cooled using a N<sub>2</sub>-flow type temperature controller. Diffraction data were collected and processed using the Crystal-Clear software.<sup>2</sup> The structures were solved by direct methods (SIR2004<sup>3</sup> for **2**, SIR2011<sup>4</sup> for **3**). Structural refinements were conducted by the full-matrix least-squares method using SHELXL-97.<sup>5</sup> Non-hydrogen atoms were refined anisotropically, and all hydrogen atoms were refined using the rigid model. All calculations were performed using the CrystalStructure crystallographic software package<sup>6</sup> except for refinement. The crystallographic data of **2** and **3** are summarized in Table S2.

## Synthesis

### Materials

2-(*p*-tolyl)pyridine (Hptpy), AgClO<sub>4</sub>, KCN, *n*-Bu<sub>4</sub>NClO<sub>4</sub>, *N*-methylimidazole, bromoethane and 2-ethoxyethanol were purchased from Wako Pure Chemical Industries. Potassium tetrachloroplatinate(II) (K<sub>2</sub>[PtCl<sub>4</sub>]) was purchased from Tanaka Holdings Co., Inc. All solvents were purchased from Kanto Chemical Co., Inc. All of solvents for the measurements were distilled by standard methods under a N<sub>2</sub> atmosphere.

1-methyl-3-ethylimidazolium Bromide ([C<sub>2</sub>mim][Br]) was synthesized by the literature method.<sup>7</sup>

[Pt(ptpy)( $\mu$ -Cl)]<sub>2</sub> was synthesized according to the synthetic method reported previously.<sup>8</sup> All of the solvents for syntheses were used without further purification. All measurements were performed under a N<sub>2</sub> atmosphere.

### K[Pt(CN)<sub>2</sub>(ptpy)] (**3**)

K[Pt(CN)<sub>2</sub>(ptpy)] was synthesized according to the literature method<sup>9</sup> with slight modifications as follows. To the suspension of [Pt(ptpy)( $\mu$ -Cl)]<sub>2</sub> (163 mg, 0.41 mmol) in acetonitrile (45 mL) was added AgClO<sub>4</sub> (85 mg, 0.82 mmol). After stirred for 7 h in the dark condition, the mixture was filtered through celite. The resulting yellow solution was evaporated to dryness. The yellow solid was suspended in methanol (45 mL), and KCN (53 mg, 0.82 mmol) was added. After stirring for 2h, the reaction mixture was filtered through celite and evaporated to dryness. Luminescent yellow powder was produced. By the recrystallization from acetone/Et<sub>2</sub>O, yellow crystals suitable for the single X-ray crystallography were obtained as **3**·2H<sub>2</sub>O·CH<sub>3</sub>COCH<sub>3</sub>, although the included acetone and water molecules were easily released in the air.

Yield, 140 mg (0.31 mmol, 74%). <sup>1</sup>H NMR (Acetone-*d*<sub>6</sub>, 270 MHz):  $\delta = 9.42$  (td,  $J = 15.1$ ,

1.6 Hz, 1H), 8.01 (d,  $J = 7.8$  Hz, 1H), 7.98 (t,  $J = 25.1$  Hz, 1H), 7.88 (d,  $J = 8.4$  Hz, 1H), 7.51 (d,  $J = 7.9$  Hz, 1H), 7.24 (td,  $J = 5.4, 1.3$  Hz, 1H), 6.85 (d,  $J = 8.0$  Hz, 1H), 2.27 (s, 3H). Anal: Calc. for  $C_{14}H_{10}N_3PtK \cdot 1.5H_2O$ : C, 34.93; H, 2.72; N, 8.73%. Found: C, 35.09; H, 2.72; N, 8.45%

### **[C<sub>2</sub>mim][Pt(CN)<sub>2</sub>(ptpy)] (1)**

K[Pt(CN)<sub>2</sub>(ptpy)] (181 mg, 0.40 mmol) and [C<sub>2</sub>mim][Br] (76 mg, 0.40 mmol) were dissolved in dichloromethane (50 mL) and stirred for 1h at room temperature. The yellow suspension was filtrated using celite, and then the yellow solution was washed with water until no bromine ions were detected in AgNO<sub>3</sub> test. The organic layer was evaporated and dried under reduced pressure at 100°C for 12h. The yellow viscous liquid was yielded. Yield, 134 mg (0.152 mmol, 38%). <sup>1</sup>H NMR (CDCl<sub>3</sub>, 270 MHz):  $\delta = 9.65$  (s, 1H), 9.28 (td,  $J = 16.7, 7.8$  Hz, 1H), 7.90 (t,  $J = 24.9$  Hz, 1H), 7.72 (t,  $J = 8.0$  Hz, 1H), 7.60 (d,  $J = 8.0$  Hz, 1H), 7.36 (d,  $J = 8.0$  Hz, 1H), 7.18 (m, 2H), 7.00 (t,  $J = 7.2$  Hz, 2H), 6.86 (d,  $J = 7.6$  Hz, 1H), 4.41 (q,  $J = 7.2$  Hz, 2H), 4.06 (s, 3H), 2.26 (s, 3H), 1.55 (s, 3H). Anal: Calc. for  $C_{20}H_{22}N_3Pt \cdot 0.5H_2O$ : C, 44.86; H, 4.14; N, 13.08%. Found: C, 44.94; H, 3.89; N, 12.90%. Included water molecules were checked by thermogravimetry-differential thermal analysis.

### ***n*-Bu<sub>4</sub>N[Pt(CN)<sub>2</sub>(ptpy)] (2)**

*n*-Bu<sub>4</sub>N[Pt(CN)<sub>2</sub>(ptpy)] was synthesized according to the literature method with slight modifications as follows. To the suspension of [Pt(ptpy)( $\mu$ -Cl)]<sub>2</sub> (144 mg, 0.18 mmol) in acetonitrile (35 mL) was added AgClO<sub>4</sub> (75 mg, 0.36 mmol). After stirred for 7 h in the dark condition, the mixture was filtered through celite. The resulting yellow solution was evaporated to dryness. The yellow solid was suspended in methanol (35 mL), and KCN (45 mg, 0.70 mmol) was added. After stirring for 2h, the reaction mixture was filtered through celite and evaporated to dryness. The resulting yellow solid was suspended in acetone (35 mL) and *n*-Bu<sub>4</sub>NClO<sub>4</sub> (119 mg, 0.35 mmol) was added. Then, the suspension was filtered through celite and evaporated under reduced pressure. By the recrystallization from MeCN/Et<sub>2</sub>O, pale yellow crystals were obtained as the acetonitrile solvated form.

Yield, 205 mg (0.31 mmol, 90%). <sup>1</sup>H NMR (Acetone-*d*<sub>6</sub>, 270 MHz):  $\delta = 9.46$  (td,  $J = 15.1, 1.6$  Hz, 1H), 8.03 (d,  $J = 7.8$  Hz, 1H), 7.96 (t,  $J = 25.1$  Hz, 1H), 7.87 (d,  $J = 8.4$  Hz, 1H), 7.50 (d,  $J = 7.9$  Hz, 1H), 7.23 (td,  $J = 5.4, 1.3$  Hz, 1H), 6.84 (d,  $J = 8.0$  Hz, 1H), 3.46 (m, 8H), 2.27 (s, 3H), 1.83(m, 8H), 1.45 (m, 8H), 0.97 (t,  $J = 7.3$  Hz, 12H). Anal.: Calc. for  $C_{30}H_{46}N_4Pt \cdot 0.5CH_3CN$ : C, 54.89; H, 7.06; N, 9.29%. Found: C, 54.71; H, 7.06; N, 9.26%.

**Table S1.** Luminescence data of neat **1** at 298 K and 77 K.

| Temperature | $\lambda_{em}^a$ (nm) | $\Phi^b$ | $\tau^c$ [ $\mu\text{s}$ ( $A^d$ )] | $\chi^2^e$ | $\tau_{av}^f$ ( $\mu\text{s}$ ) | $k_r^g$ ( $\text{s}^{-1}$ ) | $k_{nr}^h$ ( $\text{s}^{-1}$ ) |
|-------------|-----------------------|----------|-------------------------------------|------------|---------------------------------|-----------------------------|--------------------------------|
| 298 K       | 493, 532, 564         | 0.06     | 0.91 (0.86),<br>3.57 (0.362)        | 1.185      | 2.57                            | $2.3 \times 10^4$           | $3.6 \times 10^5$              |
| 77 K        | 494, 532, 561         | 0.47     | 9.72 (0.646),<br>22.09(0.449)       | 1.023      | 17.2                            | $2.7 \times 10^4$           | $3.1 \times 10^4$              |

<sup>a</sup> Emission maxima. <sup>b</sup> Photoluminescence quantum yield. <sup>c</sup> Emission lifetimes; Emission decays were analyzed with two components:  $I = A_1 \exp(-t/\tau_1) + A_2 \exp(-t/\tau_2)$ . <sup>d</sup> Pre-exponential factors. <sup>e</sup> Fitting parameter. <sup>f</sup> Average emission lifetimes were determined by using the equation 1.<sup>10</sup> <sup>g</sup> Radiative rate constants  $k_r$  were estimated by  $\Phi/\tau_{av}$ . <sup>h</sup> Nonradiative rate constants  $k_{nr}$  were estimated by  $k_{nr} = -k_r + 1/\tau_{av}$ .

$$\tau_{av} = \frac{A_1 \tau_1^2 + A_2 \tau_2^2}{A_1 \tau_1 + A_2 \tau_2} \quad (1)$$

**Table S2.** Emission lifetime data of neat **1** at 298 K recorded by different wavelength.

| $\lambda_{det}^a$ (nm)              |               | 486 - 500                                         | 501 - 550                          | 551 - 629                          |
|-------------------------------------|---------------|---------------------------------------------------|------------------------------------|------------------------------------|
| $\tau^b$ [ $\mu\text{s}$ ( $A^c$ )] | $\tau_1(A_1)$ | 0.192 (0.760)                                     | 1.035 (0.285)                      | 1.330 (0.401)                      |
|                                     | $\tau_2(A_2)$ | 0.849 (0.243)                                     | 3.565 (0.467)                      | 4.164 (0.485)                      |
|                                     | $\tau_3(A_3)$ | 3.240 (0.154)                                     |                                    |                                    |
| $\tau_{av}^d$ ( $\mu\text{s}$ )     |               | 2.14                                              | 3.18                               | 3.57                               |
| $\chi^2^e$                          |               | 1.009                                             | 1.172                              | 1.149                              |
| $k^f$ ( $\text{s}^{-1}$ )           |               | $5 \times 10^6, 1.2 \times 10^6, 3.1 \times 10^5$ | $9.6 \times 10^5, 2.8 \times 10^5$ | $7.5 \times 10^5, 2.4 \times 10^5$ |

<sup>a</sup> Emission detection regions. <sup>b</sup> Emission lifetimes; Emission decays were analyzed with two or three components:  $I = A_1 \exp(-t/\tau_1) + A_2 \exp(-t/\tau_2)$  or  $I = A_1 \exp(-t/\tau_1) + A_2 \exp(-t/\tau_2) + A_3 \exp(-t/\tau_3)$ . <sup>c</sup> Pre-exponential factors. <sup>d</sup> Average emission lifetimes determined using equation 1 or 2.<sup>10</sup> <sup>e</sup> Fitting parameter. <sup>f</sup> Rate constants of each lifetime components estimated by ( $k = 1/\tau$ ).

$$\tau_{av} = \frac{A_1 \tau_1^2 + A_2 \tau_2^2 + A_3 \tau_3^2}{A_1 \tau_1 + A_2 \tau_2 + A_3 \tau_3} \quad (2)$$

**Table S3.** Luminescence data of **1** at 298 K in MeOH ( $1.0 \times 10^{-4}$ ).

| $\lambda_{\text{em}}^a$ (nm) | $\Phi^b$ | $\tau^c$ [ $\mu\text{s}$ ( $A^d$ )] | $\chi^2^e$ | $\tau_{\text{av}}^f$ ( $\mu\text{s}$ ) | $k_r^g$ ( $\text{s}^{-1}$ ) | $k_{\text{nr}}^h$ ( $\text{s}^{-1}$ ) |
|------------------------------|----------|-------------------------------------|------------|----------------------------------------|-----------------------------|---------------------------------------|
| 486, 518, 560(sh)            | 0.03     | 1.335 (0.636)                       | 1.198      | 2.53                                   | $1.2 \times 10^4$           | $3.8 \times 10^5$                     |
|                              |          | 3.196 (0.486)                       |            |                                        |                             |                                       |

<sup>a</sup> Emission maxima. <sup>b</sup> Photoluminescence quantum yield. <sup>c</sup> Emission lifetimes; Emission decays were analyzed with two components:  $I = A_1 \exp(-t/\tau_1) + A_2 \exp(-t/\tau_2)$ . <sup>d</sup> Pre-exponential factors. <sup>e</sup> Fitting parameter. <sup>f</sup> Average emission lifetimes were determined by using the equation 1. <sup>g</sup> Radiative rate constants  $k_r$  were estimated by  $\Phi/\tau_{\text{av}}$ .

<sup>h</sup> Nonradiative rate constants  $k_{\text{nr}}$  were estimated by  $k_{\text{nr}} = -k_r + 1/\tau_{\text{av}}$ .

**Table S4.** Emission spectral data of **2**

| Temperature                 | <i>n</i> -Bu <sub>4</sub> N[Pt(CN) <sub>2</sub> (ptpy)] ( <b>2</b> ) |                   |
|-----------------------------|----------------------------------------------------------------------|-------------------|
|                             | 77 K                                                                 | 298 K             |
| $\lambda_{\text{max}}$ / nm | 486, 520, 550(sh)                                                    | 487, 521, 560(sh) |
| $\Phi_{\text{em}}$          | 0.95                                                                 | 0.72              |

**Table S5.** Emission spectral data of **3**

| Temperature                 | K[Pt(CN) <sub>2</sub> (ptpy)] ( <b>3</b> ) |       |
|-----------------------------|--------------------------------------------|-------|
|                             | 77 K                                       | 298 K |
| $\lambda_{\text{max}}$ / nm | 561                                        | 558   |
| $\Phi_{\text{em}}$          | 0.32                                       | 0.09  |

**Table S6.** Crystallographic data of **2**·CH<sub>3</sub>CN and **3**·2H<sub>2</sub>O·CH<sub>3</sub>COCH<sub>3</sub>

|                                                | <i>n</i> -Bu <sub>4</sub> N[Pt(CN) <sub>2</sub> (ptpy)]·CH <sub>3</sub> CN<br>( <b>2</b> ·CH <sub>3</sub> CN) | K[Pt(CN) <sub>2</sub> (ptpy)]·2H <sub>2</sub> O·CH <sub>3</sub> COCH <sub>3</sub><br>( <b>3</b> ·2H <sub>2</sub> O·CH <sub>3</sub> COCH <sub>3</sub> ) |
|------------------------------------------------|---------------------------------------------------------------------------------------------------------------|--------------------------------------------------------------------------------------------------------------------------------------------------------|
| Formula                                        | C <sub>32</sub> H <sub>48</sub> N <sub>5</sub> Pt                                                             | C <sub>31</sub> H <sub>30</sub> K <sub>2</sub> N <sub>6</sub> O <sub>3</sub> Pt <sub>2</sub>                                                           |
| Formula Weight                                 | 697.85                                                                                                        | 1002.99                                                                                                                                                |
| Crystal system                                 | monoclinic                                                                                                    | monoclinic                                                                                                                                             |
| Space group                                    | P2 <sub>1</sub> /c                                                                                            | P2 <sub>1</sub> /c                                                                                                                                     |
| <i>a</i> (Å)                                   | 22.614(8)                                                                                                     | 19.743(5)                                                                                                                                              |
| <i>b</i> (Å)                                   | 8.529(3)                                                                                                      | 12.197(3)                                                                                                                                              |
| <i>c</i> (Å)                                   | 17.808(6)                                                                                                     | 14.509(4)                                                                                                                                              |
| <i>α</i> (°)                                   | 90                                                                                                            | 90                                                                                                                                                     |
| <i>β</i> (°)                                   | 107.887(5)                                                                                                    | 108.445(3)                                                                                                                                             |
| <i>γ</i> (°)                                   | 90                                                                                                            | 90                                                                                                                                                     |
| <i>V</i> (Å <sup>3</sup> )                     | 3269(2)                                                                                                       | 3314(2)                                                                                                                                                |
| <i>T</i> (K)                                   | 200                                                                                                           | 150                                                                                                                                                    |
| <i>Z</i>                                       | 4                                                                                                             | 4                                                                                                                                                      |
| <i>D</i> <sub>calc</sub> (g cm <sup>-3</sup> ) | 1.418                                                                                                         | 2.010                                                                                                                                                  |
| <i>F</i> (000)                                 | 1412.00                                                                                                       | 1904.00                                                                                                                                                |
| measured reflns                                | 21244                                                                                                         | 25015                                                                                                                                                  |
| unique reflns                                  | 7163                                                                                                          | 7536                                                                                                                                                   |
| GOF on <i>F</i> <sup>2</sup>                   | 1.074                                                                                                         | 1.068                                                                                                                                                  |
| <i>R</i> <sub>int</sub>                        | 0.0393                                                                                                        | 0.0524                                                                                                                                                 |
| <i>R</i> <sub>1</sub> <sup>a</sup>             | 0.0365                                                                                                        | 0.0458                                                                                                                                                 |
| <i>wR</i> <sub>2</sub> <sup>b</sup> (all data) | 0.0961                                                                                                        | 0.1278                                                                                                                                                 |

<sup>a</sup> $R_1 = \Sigma ||F_o| - |F_c|| / \Sigma |F_o|$ . <sup>b</sup>  $wR_2 = [\Sigma w(F_o^2 - F_c^2) / \Sigma w(F_o^2)]^{1/2}$ ,  $w = [\sigma_c^2(F_o^2) + (xP)^2 + yP]^{-1}$ ,  $P = (F_o^2 - 2F_c^2) / 3$ .



**Table S7.** Selected bond lengths of **2**·CH<sub>3</sub>CN

| Atom1 | Atom2 | Length   |
|-------|-------|----------|
| Pt1   | N1    | 2.066(4) |
| Pt1   | C11   | 2.023(5) |
| Pt1   | C13   | 1.942(5) |
| Pt1   | C14   | 2.028(5) |
| N1    | C1    | 1.340(7) |
| N1    | C5    | 1.358(6) |
| N2    | C13   | 1.145(7) |
| N3    | C14   | 1.138(7) |
| C1    | C2    | 1.39(1)  |
| C2    | C3    | 1.38(1)  |
| C3    | C4    | 1.360(8) |
| C4    | C5    | 1.398(9) |
| C5    | C6    | 1.463(6) |
| C6    | C7    | 1.411(7) |
| C6    | C11   | 1.413(8) |
| C7    | C8    | 1.371(9) |
| C8    | C9    | 1.394(9) |
| C9    | C10   | 1.396(7) |
| C9    | C12   | 1.534(9) |
| C10   | C11   | 1.393(6) |

**Table S8.** Selected bond angles of **2**·CH<sub>3</sub>CN

| Atom1 | Atom2 | Atom3 | Angle    |
|-------|-------|-------|----------|
| N1    | Pt1   | C11   | 80.5(2)  |
| N1    | Pt1   | C13   | 175.1(2) |
| N1    | Pt1   | C14   | 95.3(2)  |
| C11   | Pt1   | C13   | 94.7(2)  |
| C11   | Pt1   | C14   | 175.8(2) |
| C13   | Pt1   | C14   | 89.5(2)  |
| Pt1   | N1    | C1    | 125.4(3) |
| Pt1   | N1    | C5    | 115.4(3) |
| C1    | N1    | C5    | 119.1(4) |
| N1    | C1    | C2    | 122.5(5) |
| C1    | C2    | C3    | 118.1(6) |
| C2    | C3    | C4    | 120.2(6) |
| C3    | C4    | C5    | 119.7(5) |
| N1    | C5    | C4    | 120.2(4) |
| N1    | C5    | C6    | 114.1(4) |
| C4    | C5    | C6    | 125.7(4) |
| C5    | C6    | C7    | 122.5(4) |
| C5    | C6    | C11   | 116.2(4) |
| C7    | C6    | C11   | 121.3(4) |
| C6    | C7    | C8    | 119.2(5) |
| C7    | C8    | C9    | 121.5(5) |
| C8    | C9    | C10   | 118.3(5) |
| C8    | C9    | C12   | 121.3(5) |
| C10   | C9    | C12   | 120.5(5) |
| C9    | C10   | C11   | 122.9(5) |
| Pt1   | C11   | C6    | 113.6(3) |
| Pt1   | C11   | C10   | 129.7(4) |
| C6    | C11   | C10   | 116.7(4) |
| Pt1   | C13   | N2    | 178.6(4) |
| Pt1   | C14   | N3    | 177.3(5) |

**Table S9.** Selected bond lengths of  $3 \cdot 2\text{H}_2\text{O} \cdot \text{CH}_3\text{COCH}_3$ 

| Atom1 | Atom2 | Length   |
|-------|-------|----------|
| Pt1   | N1    | 2.055(8) |
| Pt1   | C11   | 2.018(7) |
| Pt1   | C13   | 1.926(9) |
| Pt1   | C14   | 2.022(7) |
| N1    | C1    | 1.35(1)  |
| N1    | C5    | 1.360(9) |
| N2    | C13   | 1.16(1)  |
| N3    | C14   | 1.16(1)  |
| C1    | C2    | 1.39(1)  |
| C2    | C3    | 1.37(1)  |
| C3    | C4    | 1.37(1)  |
| C4    | C5    | 1.40(1)  |
| C5    | C6    | 1.46(1)  |
| C6    | C7    | 1.394(9) |
| C6    | C11   | 1.42(1)  |
| C7    | C8    | 1.39(1)  |
| C8    | C9    | 1.42(1)  |
| C9    | C10   | 1.39(1)  |
| C9    | C12   | 1.49(1)  |
| C10   | C11   | 1.40(1)  |
| Pt2   | N4    | 2.055(8) |
| Pt2   | C25   | 2.018(7) |
| Pt2   | C27   | 1.926(9) |
| Pt2   | C28   | 2.022(7) |
| N4    | C15   | 1.35(1)  |
| N4    | C19   | 1.360(9) |
| N5    | C27   | 1.16(1)  |
| N6    | C28   | 1.16(1)  |
| C15   | C16   | 1.38(1)  |
| C16   | C17   | 1.38(1)  |
| C17   | C18   | 1.37(1)  |

|     |     |         |
|-----|-----|---------|
| C18 | C19 | 1.39(1) |
| C19 | C20 | 1.47(1) |
| C20 | C21 | 1.39(1) |
| C20 | C25 | 1.36(1) |
| C21 | C22 | 1.36(1) |
| C22 | C23 | 1.43(1) |
| C23 | C24 | 1.39(1) |
| C23 | C26 | 1.50(1) |
| C24 | C25 | 1.41(1) |

---

**Table S10.** Selected bond angles of  $3 \cdot 2\text{H}_2\text{O} \cdot \text{CH}_3\text{COCH}_3$ 

| Atom1 | Atom2 | Atom3 | Angle    |
|-------|-------|-------|----------|
| N1    | Pt1   | C11   | 81.0(3)  |
| N1    | Pt1   | C13   | 174.9(3) |
| N1    | Pt1   | C14   | 95.6(3)  |
| C11   | Pt1   | C13   | 94.0(3)  |
| C11   | Pt1   | C14   | 176.3(3) |
| C13   | Pt1   | C14   | 89.3(3)  |
| Pt1   | N1    | C1    | 124.7(6) |
| Pt1   | N1    | C5    | 115.4(5) |
| C1    | N1    | C5    | 119.9(7) |
| N1    | C1    | C2    | 121.4(8) |
| C1    | C2    | C3    | 117.9(8) |
| C2    | C3    | C4    | 121.9(9) |
| C3    | C4    | C5    | 118.3(8) |
| N1    | C5    | C4    | 120.5(7) |
| N1    | C5    | C6    | 114.3(7) |
| C4    | C5    | C6    | 125.2(7) |
| C5    | C6    | C7    | 123.3(7) |
| C5    | C6    | C11   | 116.0(7) |
| C7    | C6    | C11   | 120.7(7) |
| C6    | C7    | C8    | 121.3(7) |
| C7    | C8    | C9    | 118.6(7) |
| C8    | C9    | C10   | 119.6(7) |
| C8    | C9    | C12   | 121.4(7) |
| C10   | C9    | C12   | 122.6(7) |
| C9    | C10   | C11   | 122.9(5) |
| Pt1   | C11   | C6    | 113.3(6) |
| Pt1   | C11   | C10   | 129.4(6) |
| C6    | C11   | C10   | 117.3(7) |
| Pt1   | C13   | N2    | 178.0(8) |
| Pt1   | C14   | N3    | 178.9(8) |
| N4    | Pt2   | C25   | 80.2(3)  |

|     |     |     |          |
|-----|-----|-----|----------|
| N4  | Pt2 | C27 | 175.3(3) |
| N4  | Pt2 | C28 | 95.8(3)  |
| C25 | Pt2 | C27 | 95.5(3)  |
| C25 | Pt2 | C28 | 174.7(3) |
| C27 | Pt2 | C28 | 88.4(4)  |
| Pt2 | N4  | C15 | 123.7(5) |
| Pt2 | N4  | C19 | 115.3(5) |
| C15 | N4  | C19 | 120.9(6) |
| N4  | C15 | C16 | 121.3(7) |
| C15 | C16 | C17 | 119.4(8) |
| C16 | C17 | C18 | 118.5(8) |
| C17 | C18 | C19 | 121.1(7) |
| N4  | C19 | C18 | 118.8(7) |
| N4  | C19 | C20 | 114.2(6) |
| C18 | C19 | C20 | 127.0(7) |
| C19 | C20 | C21 | 122.5(7) |
| C19 | C20 | C25 | 115.9(7) |
| C21 | C20 | C25 | 121.6(7) |
| C20 | C21 | C22 | 121.2(8) |
| C21 | C22 | C23 | 119.7(8) |
| C22 | C23 | C24 | 118.1(7) |
| C22 | C23 | C26 | 120.7(7) |
| C24 | C23 | C26 | 121.2(7) |
| C23 | C24 | C25 | 122.6(7) |
| Pt2 | C25 | C20 | 114.0(5) |
| Pt2 | C25 | C24 | 129.1(5) |
| C20 | C25 | C24 | 116.8(7) |
| Pt2 | C27 | N5  | 175.8(8) |
| Pt2 | C28 | N6  | 176.4(8) |

---

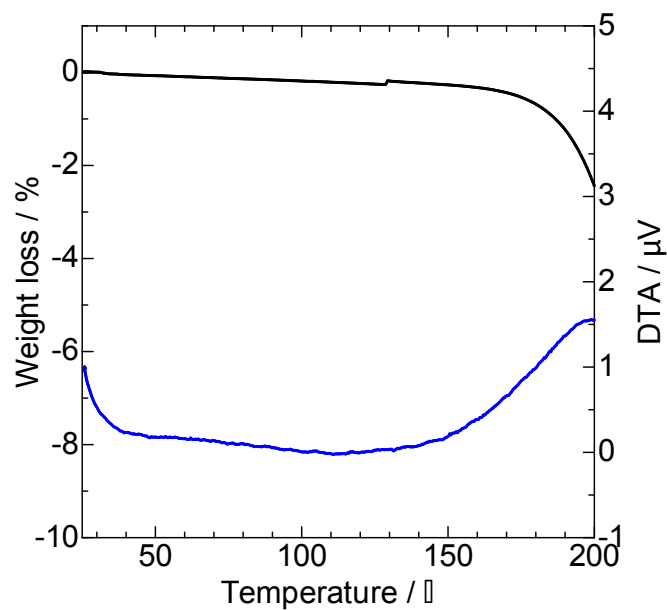

**Fig. S1** Thermogravimetry-differential thermal analyses of **1** at scan rate of 5 K min<sup>-1</sup> (TG (black), DTA (blue)).

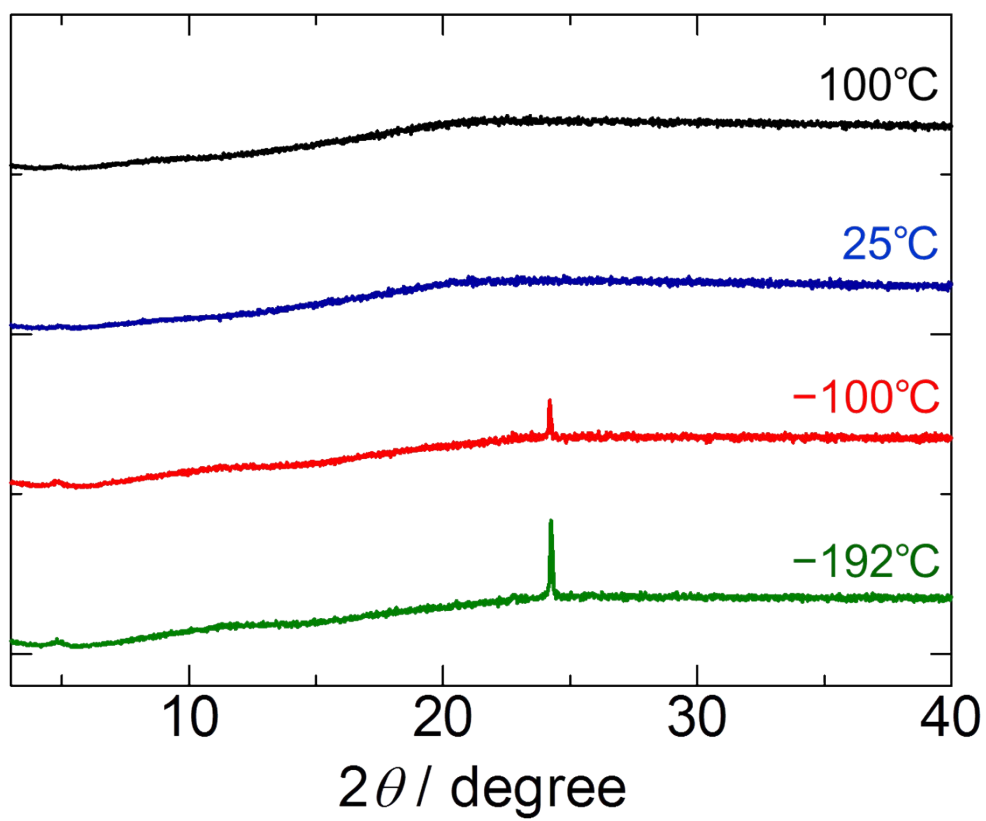

**Fig. S2** VT-PXRD patterns of **1** at 100°C (black), 25°C (blue), -100°C (red) and -192°C (green).



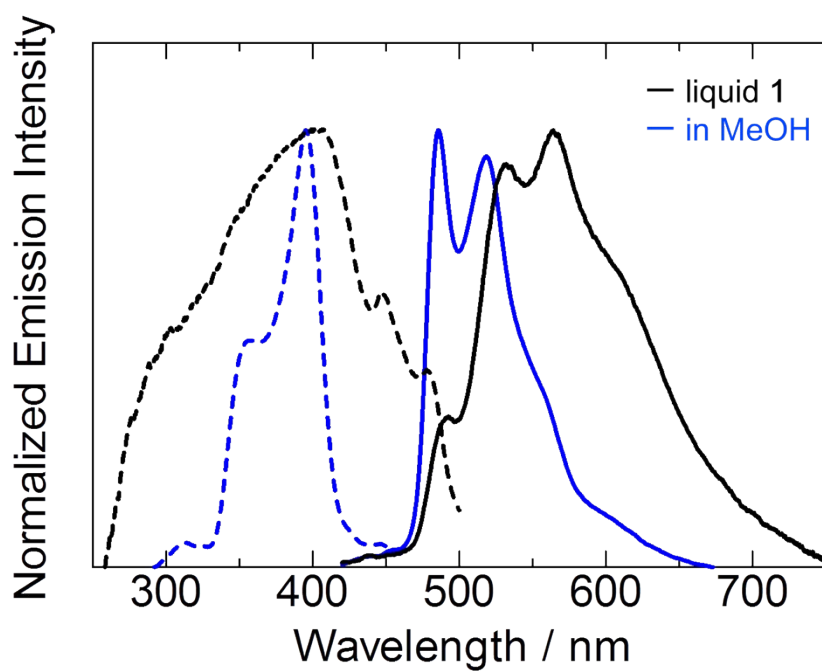

**Fig. S3** Emission (solid lines) and excitation (dotted lines) spectra of **1** in liquid state (black,  $\lambda_{\text{ex}} = 400$  nm,  $\lambda_{\text{em}} = 560$  nm) and a MeOH solution ( $1.0 \times 10^{-3}$  mol L<sup>-1</sup>) (blue,  $\lambda_{\text{ex}} = 400$  nm,  $\lambda_{\text{em}} = 480$  nm) at 298 K under N<sub>2</sub> atmosphere.

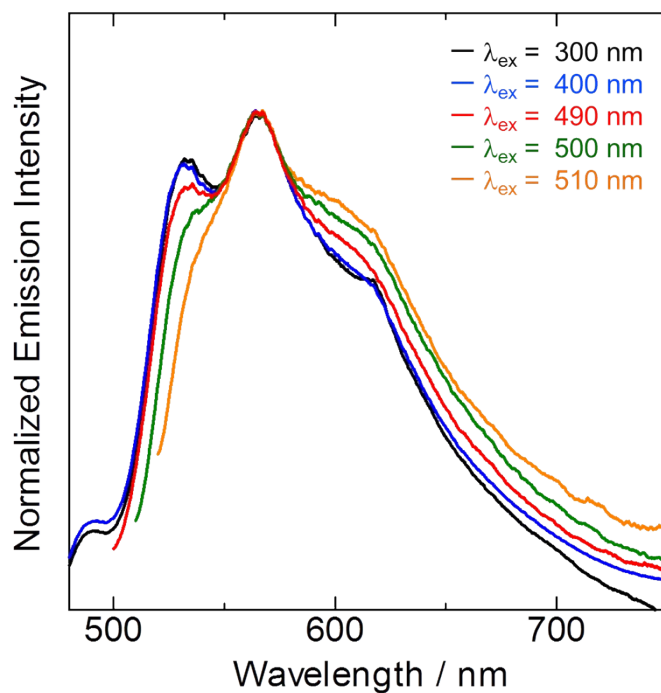

**Fig. S4** Excitation wavelength dependency for emission spectra of **1**. Thin liquid membrane condition of neat **1** sandwiched in two quartz plates were measured under N<sub>2</sub> atmosphere at 298 K.

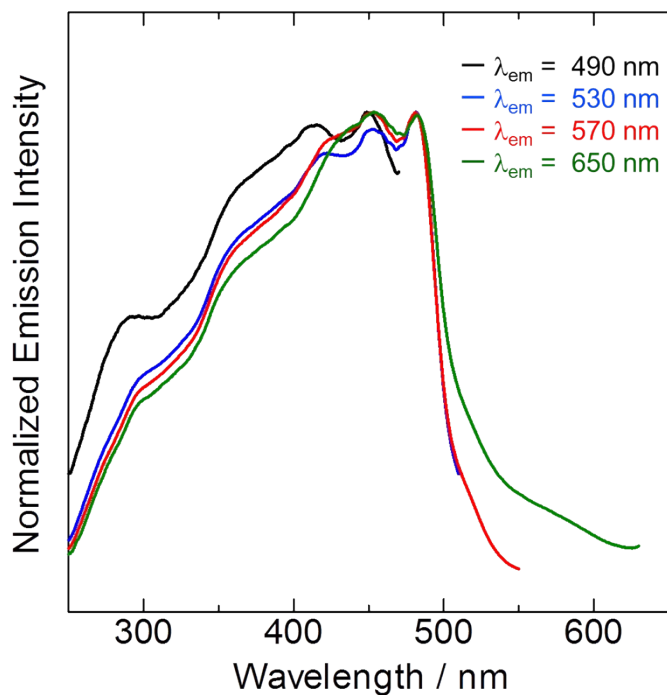

**Fig. S5** Excitation spectra of **1** detected at different emission wavelengths at 298 K. Neat liquid state of **1** were measured with quartz tube under N<sub>2</sub> atmosphere.

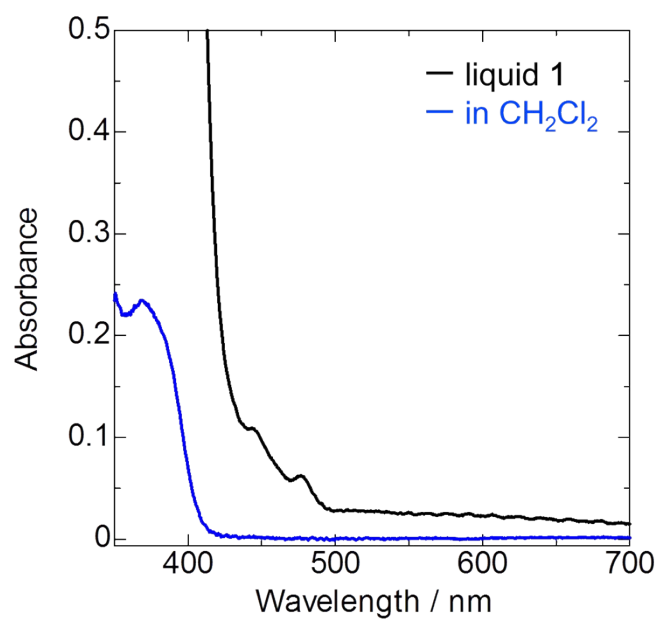

**Fig. S6** Absorption spectra of neat liquid **1** (black line) and **1** in CH<sub>2</sub>Cl<sub>2</sub> (blue line,  $1.0 \times 10^{-4}$  M)

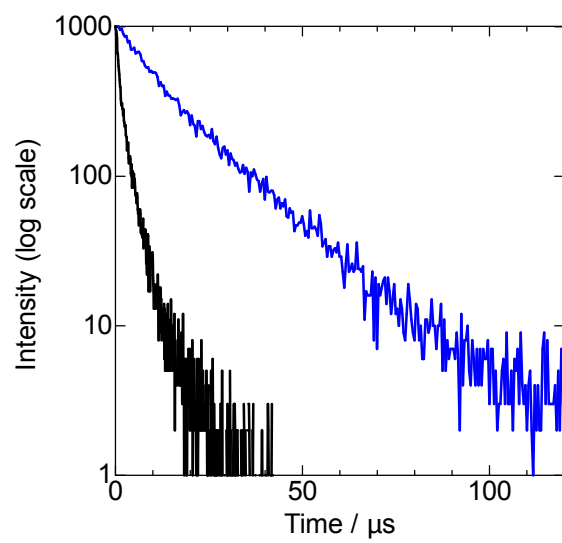

**Fig. S7** Emission decay curves of ionic liquid **1** at 298 K (black line) and 77 K (blue line).

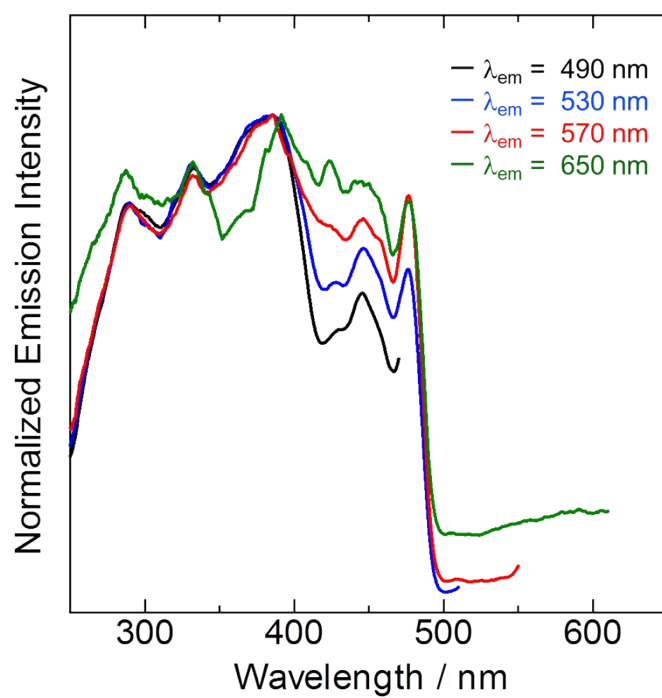

**Fig. S8** Excitation spectra of **1** detected at different emission wavelengths at 77 K. Neat of **1** was measured with a quartz tube under N<sub>2</sub> atmosphere.

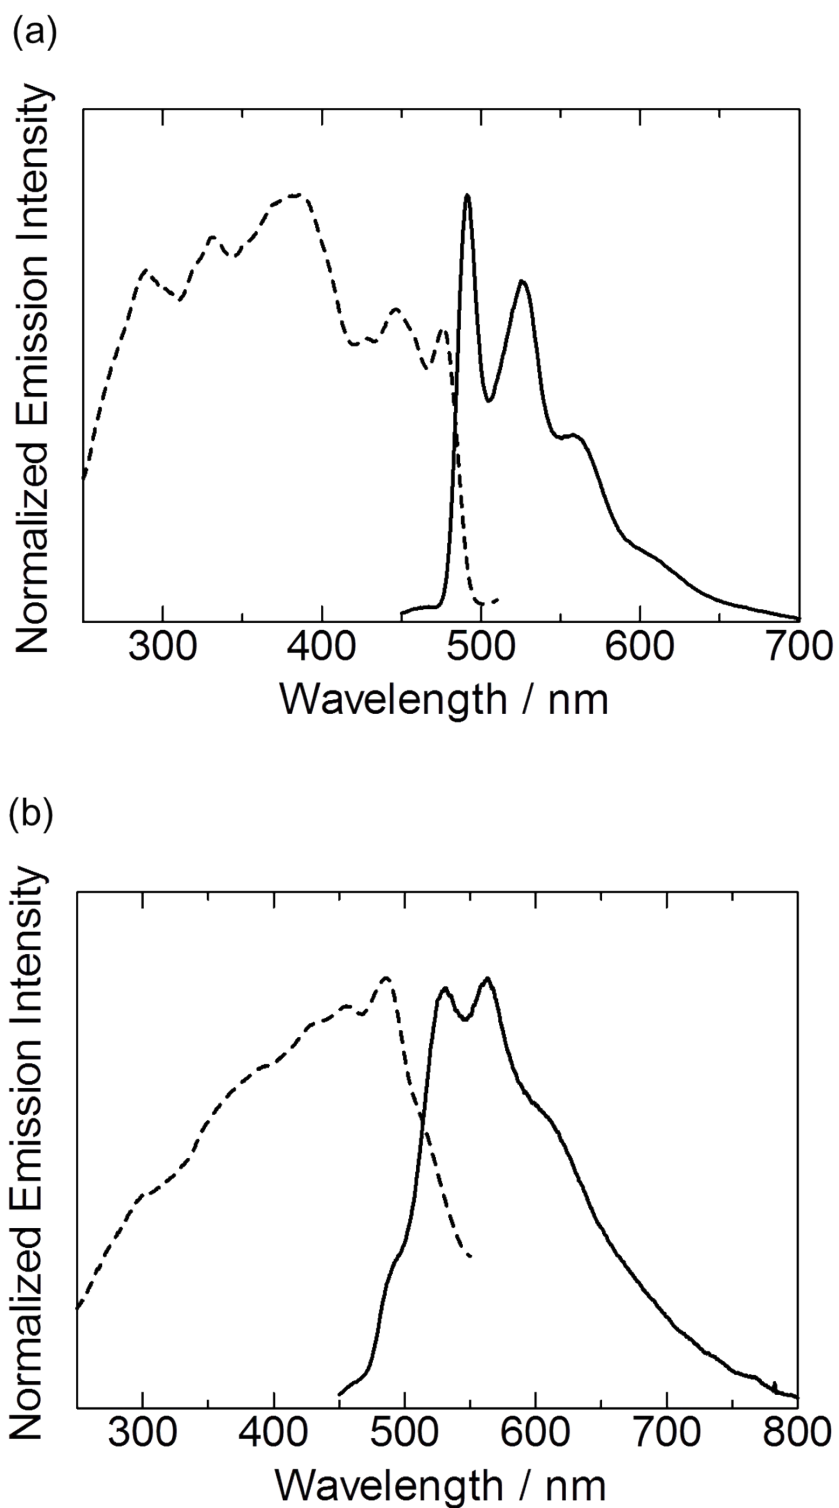

**Fig. S9** Emission (solid lines) and excitation (dotted lines) spectra of neat **1** at (a) 77 K ( $\lambda_{\text{ex}} = 400$  nm,  $\lambda_{\text{em}} = 560$  nm) and (b) 333 K ( $\lambda_{\text{ex}} = 400$  nm,  $\lambda_{\text{em}} = 570$  nm) under  $\text{N}_2$  atmosphere.

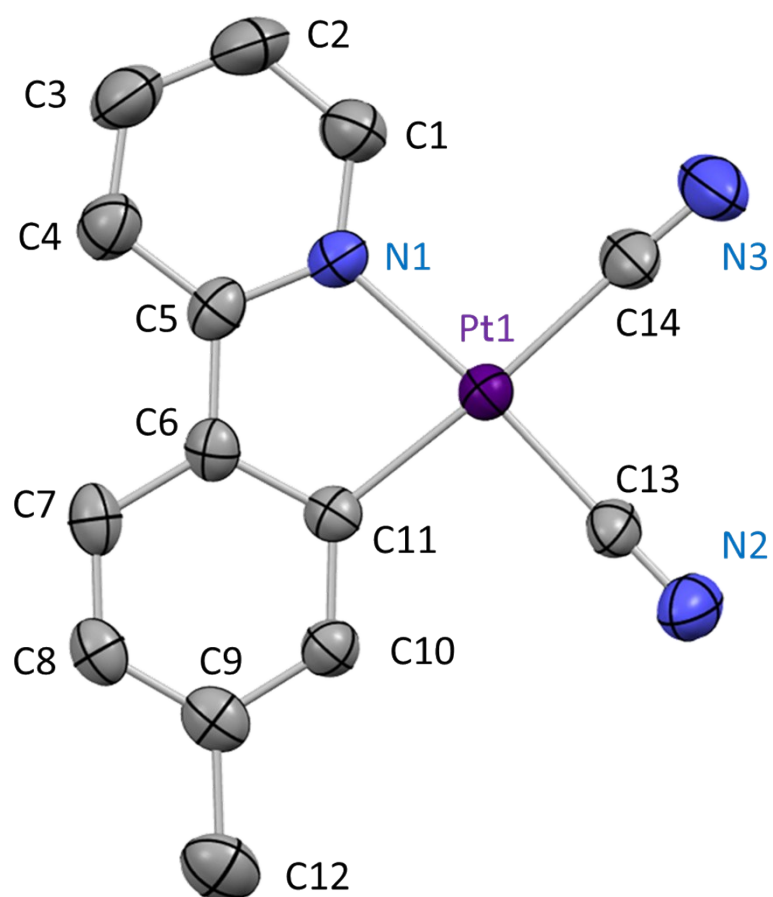

**Fig. S10** Molecular structure of  $[\text{Pt}(\text{CN})_2(\text{pty})]^-$  in complex **2**· $\text{CH}_3\text{CN}$ . H atoms are omitted for clarity.

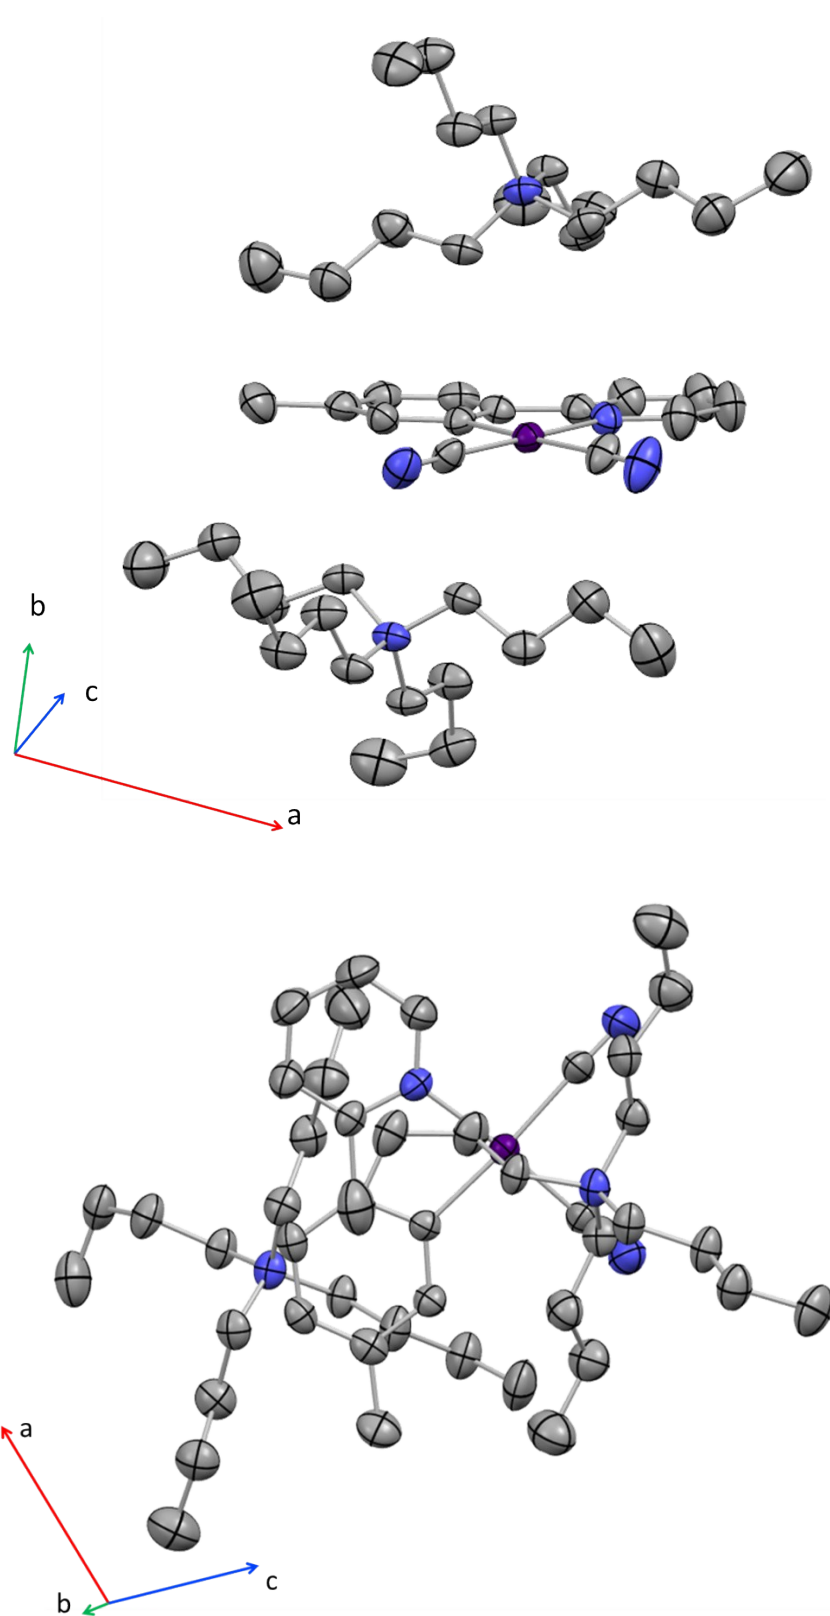

**Fig. S11** Perspective views of the complex anion and adjacent  $n\text{-Bu}_4\text{N}^+$  cations in  $2 \cdot \text{CH}_3\text{CN}$ .  
H atoms are omitted for clarity.



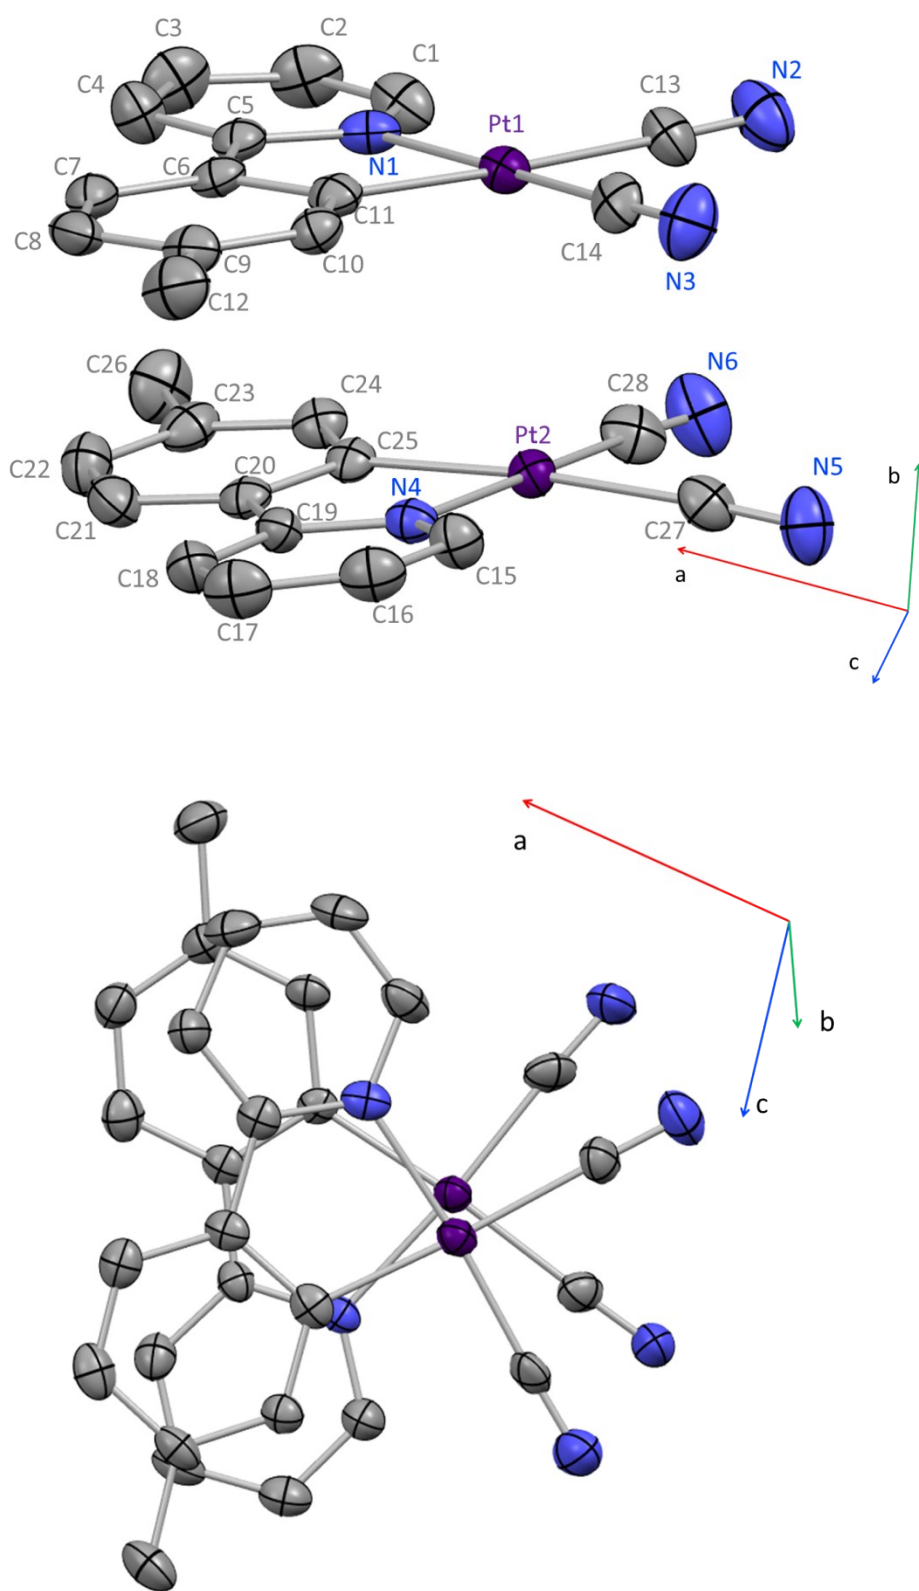

**Fig. S12** Perspective views illustrating the dimeric complex anions in  $3 \cdot 2\text{H}_2\text{O} \cdot \text{CH}_3\text{COCH}_3$ . H atoms are omitted for clarity.

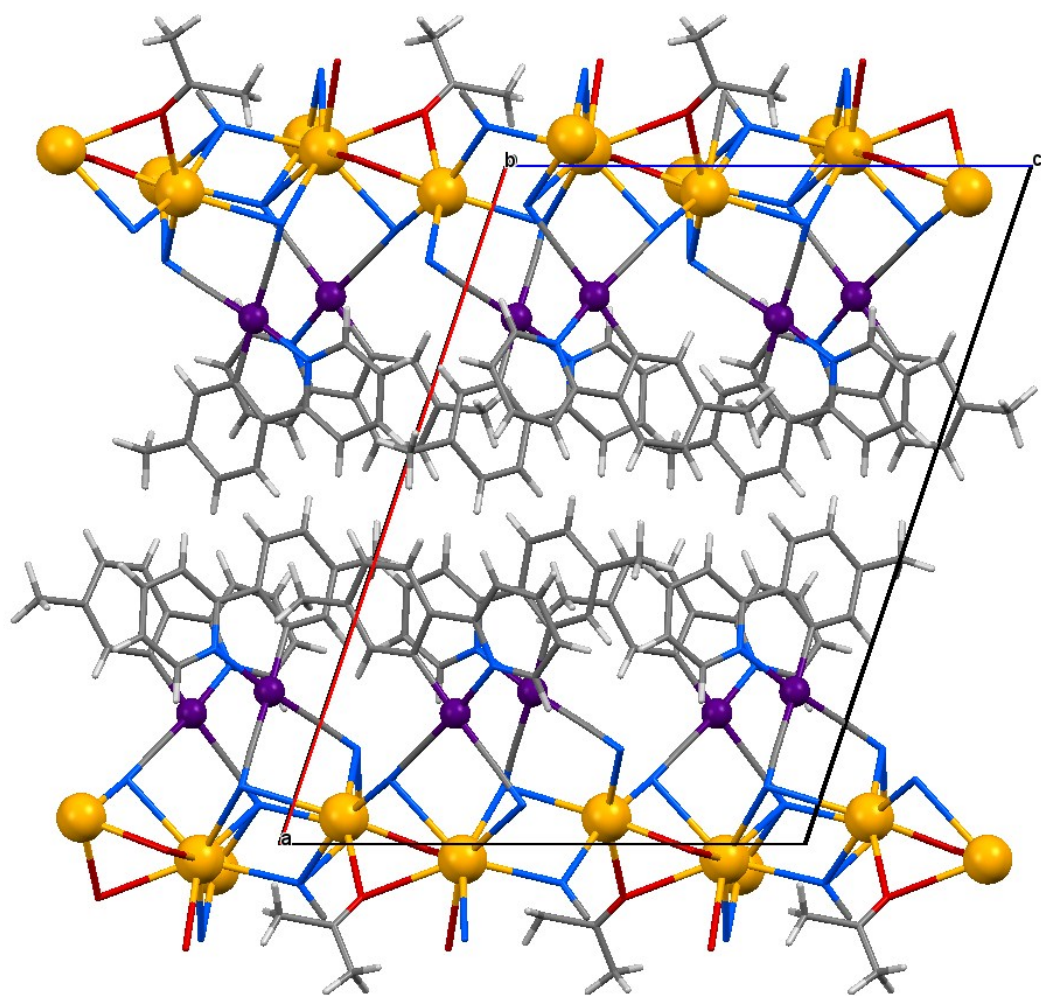

**Fig. S13** Packing diagram of  $3 \cdot 2\text{H}_2\text{O} \cdot \text{CH}_3\text{COCH}_3$ . Colour code: Pt, purple; C grey; N, blue;

O, red; K, orange.

## References

1. (a) W. R. Dawson and M. W. Windsor, *J. Phys. Chem.*, 1968, **72**, 325; (b) W. H. Melhuish, *J. Phys. Chem.*, 1961, **65**, 229.
2. CrystalClear, Molecular Structure Corporation, Oren, UT, 2001.
3. SIR-2004: M. G. Burla, R. Caliandro, M. Camalli, B. Carrozzini, G. L. Cascarano, L. DeCaro, C. Giacovazzo, G. Polidori and R. Spagna, *J. Appl. Crystallogr.*, 2005, **38**, 381.
4. SIR-2011: M. C. Burla, R. Caliandro, M. Camalli, B. Carrozzini, G. L. Cascarano, C. Giacovazzo, M. Mallamo, A. Mazzone, G. Polidori and R. Spagna, *J. Appl. Crystallogr.*, 2012, **45**, 357.
5. SHELXL97: G. M. Sheldrick, *Acta Crystallogr., Sect. A: Fundam. Crystallogr.*, 2008, **64**, 112.
6. *CrystalStructure 4.0*, Rigaku Corporation, Tokyo196-8666, Japan, 2000-2010.
7. C. C. Weber, A. F. Masters and T. Maschmeyer, *Angew. Chem. Int. Ed.*, 2012, **51**, 11483.
8. H. Uesugi, T. Tsukuda, K. Takao and T. Tsubomura, *Dalton Trans.*, 2013, **42**, 7396.
9. J. Forniés, S. Fuertes, J. A. López, A. Martín and V. Sicilia, *Inorg. Chem.*, 2008, **47**, 7166.
10. J. R. Lakowicz, *Principles of Fluorescence Spectroscopy*, Springer, New York, 2006, pp. 141–142.
